# Supplementary material for: A high-performance logic inverter achieved using mixed-dimensional WSe2/n+-Si and MoS2/p+-Si junction field-effect transistors
Source: Royal Society of Chemistry journal article supplement (doi:10.1039/d3tc02837b), 2023-01-01
Supplement: d3tc02837b1.pdf [file d3tc02837b1.pdf]

## Electronic Supplementary Information

# **High-Performance Logic Inverter by Mixed-Dimensional WSe<sub>2</sub>/n<sup>+</sup>-Si and MoS<sub>2</sub>/p<sup>+</sup>-Si Junction Field-effect Transistors**

*Yoonsok Kim<sup>†</sup>, Taeyoung Kim, Wonchae Jeong, Mun Seok Jeong\*, and Eun Kyu Kim\**

Department of Physics and Research Institute of Natural Science, Hanyang University,

Seoul 04763, South Korea

<sup>†</sup> Yoonsok Kim present works at Institute of Plasma Technology, Korea Institute of Fusion Energy

\* Corresponding authors; E-mail: mjeong@hanyang.ac.kr, ek-kim@hanyang.ac.kr

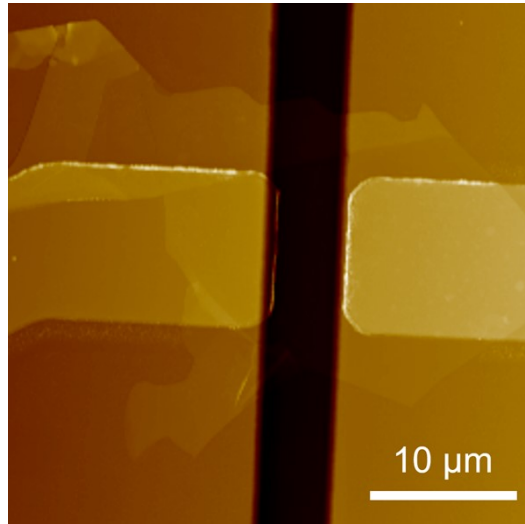

**Fig. S1** Atomic force microscopy image of the  $\text{WSe}_2/n^+\text{-Si}$  JFET device.

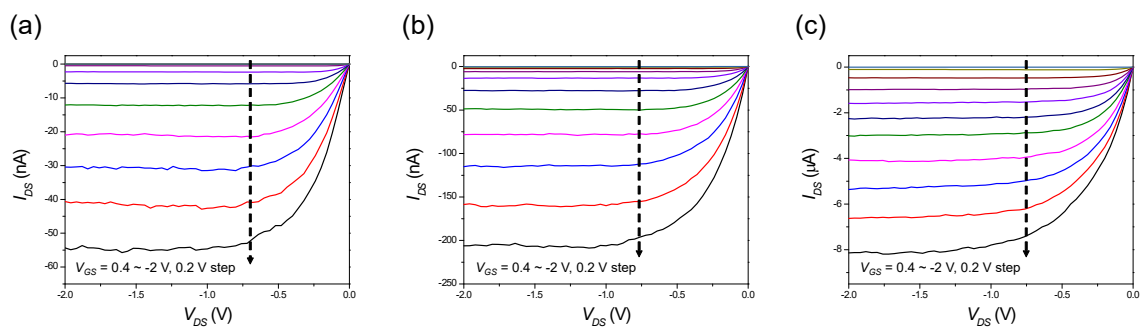

**Fig. S2** Output characteristics of (a) pristine, (b) PMMA-coated, and (c) PBVE-coated  $\text{WSe}_2$  JFET devices at various gate voltages.

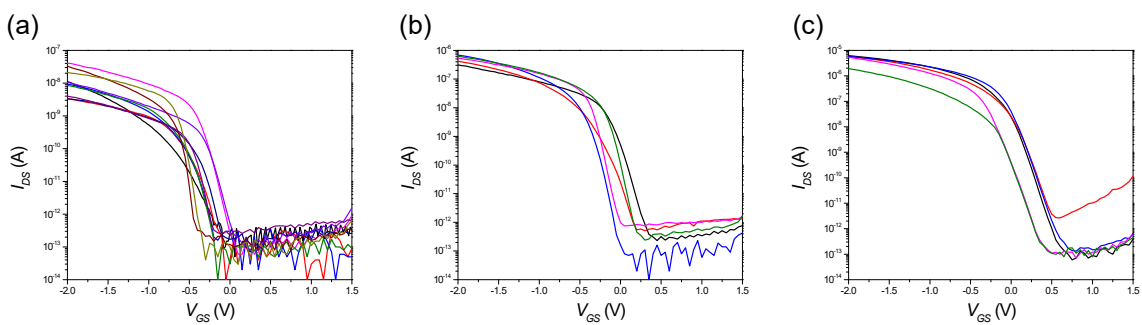

**Fig. S3** Transfer characteristics of (a) 10 pristine devices, (b) 5 PMMA-coated devices, and (c) PBVE-coated devices used in the statistical variation analysis (all the data were measured at a drain voltage of  $-1$  V).

**Supplementary Note 1) Extraction contact resistance and carrier concentration from typical WSe<sub>2</sub> FETs.**

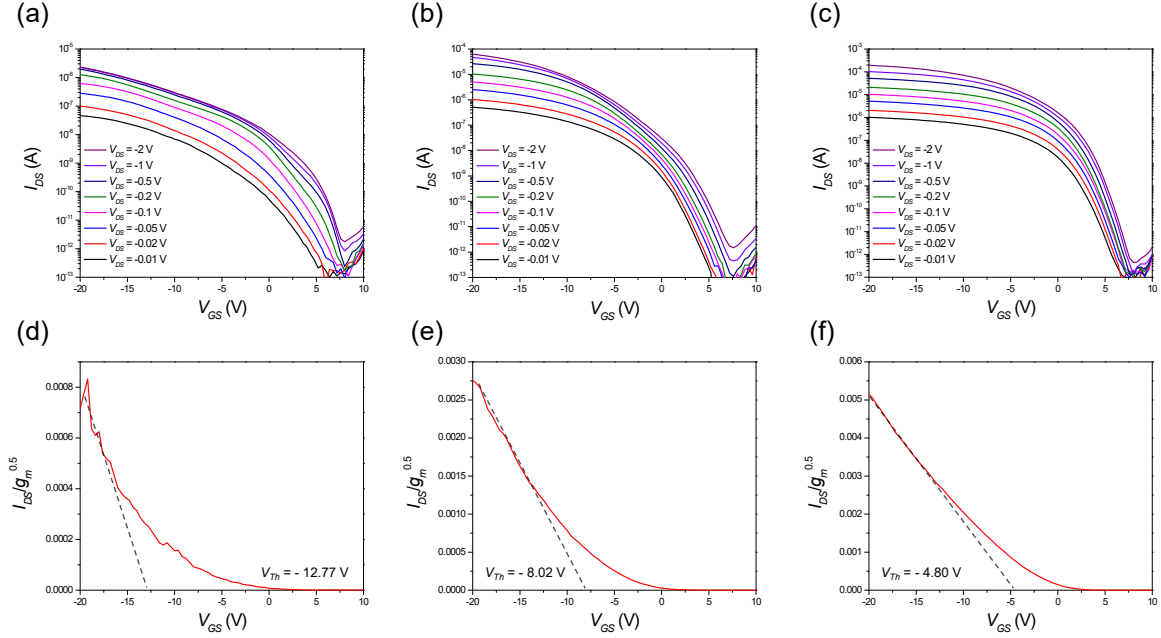

**Fig. S4** Transfer characteristics of typical WSe<sub>2</sub> FETs: (a) pristine, (b) PMMA-coated, and (c) PBVE-coated samples; Y-function calculation of FETs with (d) pristine, (e) PMMA-coated, and (f) PBVE-coated samples.

The contact resistance values were obtained using the Y-function method.<sup>[1]</sup> Considering the contact resistance, the voltage additionally drops at the interface between the source and drain electrodes. The  $I$ - $V$  characteristics can be described as:

$$I_{DS} = \left( \frac{\mu_0}{1 + \theta(V_{GS} - V_{Th})} \right) C_{ox} \frac{W}{L} (V_{GS} - V_{Th}) V_{DS}$$

where  $\theta$  is the mobility reduction coefficient,  $\mu_0$  is the low-field mobility,  $V_{Th}$  is the threshold voltage, and  $C_{ox} = 1.28 \times 10^{-8}$  F/cm<sup>2</sup> is the back-gate capacitance from SiO<sub>2</sub> thickness of 270 nm.

If the contact resistance is independent of the gate voltage, then the Y-function can be defined as:

$$Y = \frac{I_{DS}}{\sqrt{g_m}} = \left( \frac{\mu_0 C_{ox} V_{DS} W}{L} \right)^{0.5} (V_{GS} - V_{Th})$$

From  $\theta \approx \mu_0 C_{ox} R_c W/L$ , the contact resistance  $R_c$  can be obtained. As a result, the contact resistance decreased from 318 k $\Omega$  for the pristine device, to 34.9 k $\Omega$  and 15.6 k $\Omega$  for PMMA, and PBVE-coated devices, respectively.

The carrier concentration of the pristine WSe<sub>2</sub> device was extracted from the linear fitting of the output curve at zero-gate voltage and low drain voltage region using the following equation:<sup>[2]</sup>

$$\rho = \left( \frac{dI_{DS}}{dV_{DS}} \right)^{-1} \frac{tW}{L}, \quad N_a = \frac{1}{e\rho\mu}$$

where  $\rho$  is the conductivity,  $N_a$  is the hole carrier concentration,  $e = 1.602 \times 10^{-19}$  C is the electron unit charge,  $\mu$  is the hole mobility, and  $t$  is the channel thickness. In the case of PMMA and PBVE-coated samples, the carrier concentrations were obtained from the threshold voltage shift using the following equation.<sup>[3]</sup>

$$n = \frac{C_{ox} \Delta V_{Th}}{e}$$

where  $n$  is the variance of the carrier concentration on a two-dimensional scale (cm<sup>-2</sup>),  $\Delta V_{Th}$  is the threshold voltage shift from the pristine sample. From the forementioned equations, the hole carrier concentrations were calculated to be approximately  $1.25 \times 10^{15}$  cm<sup>-3</sup> ( $= 1.25 \times 10^9$  cm<sup>-2</sup>),  $2.72 \times 10^{17}$  cm<sup>-3</sup> ( $= 3.80 \times 10^{11}$  cm<sup>-2</sup>), and  $4.90 \times 10^{17}$  cm<sup>-3</sup> ( $= 6.38 \times 10^{11}$  cm<sup>-2</sup>) for pristine, PMMA-coated and PBVE-coated FET devices, respectively.

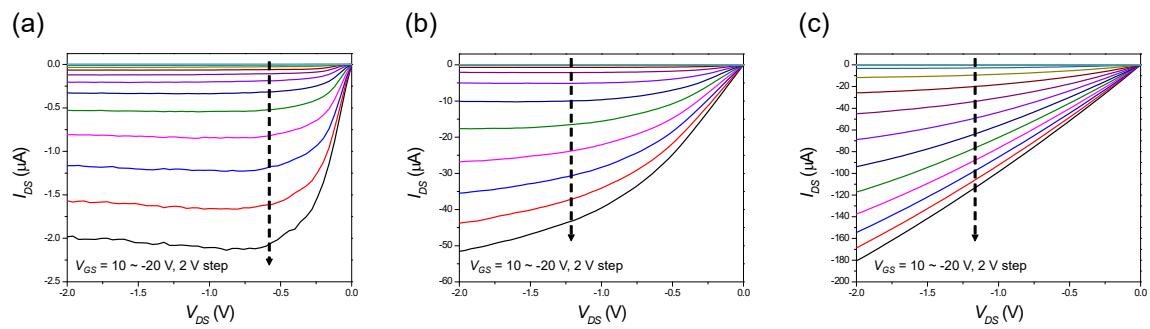

**Fig. S5** Output characteristics of the typical WSe<sub>2</sub> FET with (a) pristine, (b) PMMA-coated, and (c) PBVE-coated devices at various gate voltages.

## Supplementary Note 2) Low-frequency noise characteristics of the WSe<sub>2</sub>/n<sup>+</sup>-Si JFETs.

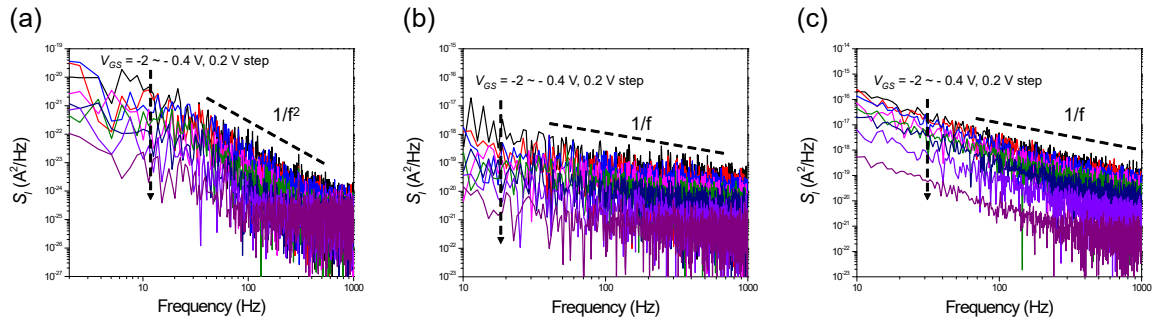

**Fig. S6** Low-frequency noise characteristics of (a) pristine, (b) PMMA-coated, and (c) PBVE-coated JFETs measured at a drain voltage of  $-1$  V (gate voltages range from  $-2$  V to  $-0.4$  V with  $0.2$  V steps).

Low-frequency noise behavior can be explained the following empirical equation:<sup>[4]</sup>

$$\frac{S_I}{I_{DS}^2} = \frac{A}{f^\beta}$$

where  $S_I$  is the current power spectral density,  $I_{DS}$  is the average drain current,  $A$  is the noise amplitude,  $f$  is the frequency, and  $\beta$  is the scaling exponent factor. In the case of PMMA- and PBVE-coated devices, the power spectral density showed the factor  $\beta$  close to unity, which follows  $1/f$  noise, also called the flicker noise. This result indicates that the polymer coating treatment provides additional interface trap density between the polymers and WSe<sub>2</sub> channel, and is consistent with the mobility degradation after polymer doping. On the contrary, the pristine sample showed  $\beta$  values close to two properties, corresponding to the noise characteristics of the generation-recombination (G-R) process. It has been suggested that TMDs, such as MoTe<sub>2</sub>, are sensitive to ambient conditions, and several oxygen atoms may affect the WSe<sub>2</sub> channel layer as defect sites.<sup>[5]</sup> This phenomenon has been observed in MoS<sub>2</sub> devices under low-temperature conditions with low carrier concentrations.<sup>[6]</sup> It can be

considered that our pristine WSe<sub>2</sub> JFET showed G-R noise at room temperature conditions owing to the low concentration of the pristine WSe<sub>2</sub> flake and nearly nonexistent channel/dielectric interface noise.

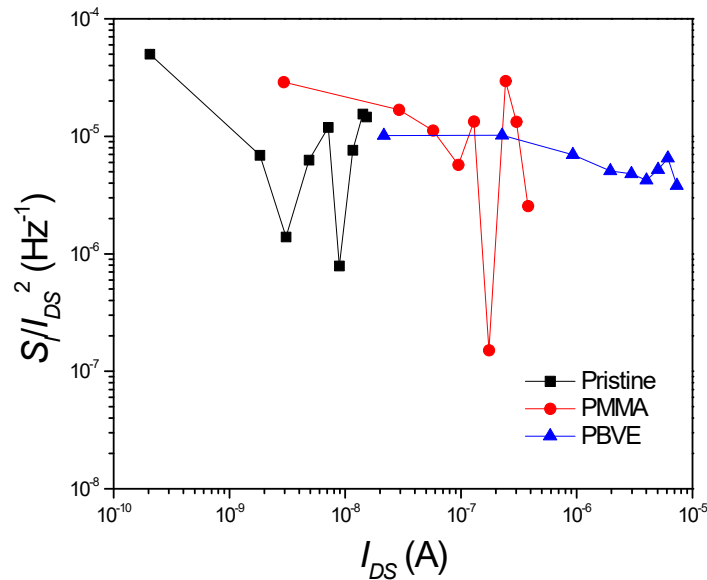

**Fig. S7** Normalized noise power spectral densities of the pristine, PMMA, and PBVE-coated WSe<sub>2</sub> JFET devices.

Because our polymer doping affects not only the channel area, but also the contact resistance, we must consider the influence of contact resistance. The noise caused by the contact resistance was different from the channel noise. For example, the normalized power spectral density gradually decreases as the drain current increases owing to the channel noise.<sup>[7]</sup> Conversely, the normalized power spectral density gradually increases with contact noise.<sup>[8]</sup> However, such tendencies owing to the contact resistance were not observed in Fig. S7. This result indicates that the low-frequency noise which originating from the contact resistance can be ignored.



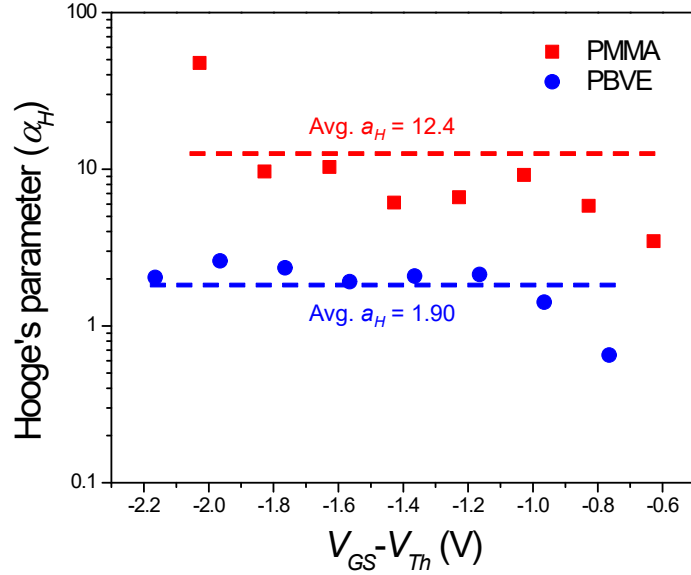

**Fig. S8** The Hooge's parameter extracted from the 1/f noise characteristics as a function of gate voltage for PMMA and PBVE-coated WSe<sub>2</sub> JFET devices.

The 1/f noise characteristics can be analyzed by the two main perspectives. One is the Hooge mobility fluctuation (HMF) model, and the other is the carrier number fluctuation (CNF) model. The HMF model originates from random mobility fluctuation via lattice scattering, whereas the CNF model is responsible for the capture and release of carriers at interface and gate oxide trap states. Although typical 2D MOSFETs are generally explained by the CNF model, we applied the HMF model to our doped WSe<sub>2</sub> devices. The first reason is because of the device structure. MESFETs and JFETs do not consist of a gate oxide layer. The HMF model was also applied to ZnO MESFET in previous research.<sup>[9]</sup> The other reason originates from the thickness of the WSe<sub>2</sub> channel layer. Previous research showed that MoS<sub>2</sub> transistors follow the CNF model in strong-accumulation or single and few-layer thickness of the

channel.<sup>[10]</sup> While HMF model can be applied to the MoS<sub>2</sub> transistors in relatively thick channel or weak-accumulation state. In the case of our research, the WSe<sub>2</sub> JFET devices cannot be strongly accumulated and consist of relatively thick WSe<sub>2</sub> flakes. Because of the reasons above, the HMF model is reasonable for our doped WSe<sub>2</sub> JFETs. The HMF model of the 1/f noise can be expressed by the equation in the saturation region:<sup>[9]</sup>

$$S_I = \frac{e\mu(V_{GS} - V_{Th})I_{DS}\alpha_H}{L^2 f}$$

where,  $\alpha_H$  is the dimensionless Hooge's parameter. The  $\alpha_H$  was first suggested as an universal constant having a value of  $2 \times 10^{-3}$ .<sup>[11]</sup> However, it was quickly discovered that the  $\alpha_H$  have dependency of fabrication process and material quality.<sup>[12]</sup> Nevertheless, the  $\alpha_H$  can be used as indicator for evaluating the performance of the devices. In organic transistors, the  $\alpha_H$  is reported to be high values about 10.<sup>[13,14]</sup> The  $\alpha_H$  values of PMMA and PBVE-coated devices are presented in Fig. S8. The PBVE-coated JFET device showed the average  $\alpha_H$  of 1.90. However, the PMMA-coated device represented higher  $\alpha_H$  value than that of PBVE-coated device, of 12.4. The result indicates that PMMA coating provide stronger surface scattering than that of PBVE coating, and this is consistent with the mobility values above.

## References

- [1] H. Y. Chang, W. Zhu and D. Akinwande, *Appl. Phys. Lett.*, 2014, **104**, 113504.
- [2] D. Chu and E. K. Kim, *Adv. Electron. Mater.*, 2019, **5**, 1800695.
- [3] S. Zhang, H. M. Hill, K. Moudgil, C. A. Richter, A. R. Hight Walker, S. Barlow, S. R. Marder, C. A. Hacker and S. J. Pookpanratana, *Adv. Mater.*, 2018, **30**, 1802991.
- [4] B. Zhang, C. Hu, Y. Xin, Y. Li, Y. Xie, Q. Xing, Z. Guo, Z. Xue, D. Li, G. Zhang, L. Geng, Z. Ke and C. Wang, *Nanomaterials*, 2022, **12**, 1325.
- [5] Y. F. Lin, Y. Xu, C. Y. Lin, Y. W. Suen, M. Yamamoto, S. Nakaharai, K. Ueno and K. Tsukagoshi, *Adv. Mater.*, 2015, **27**, 6612.
- [6] V. K. Sangwan, H. N. Arnold, D. Jariwala, T. J. Marks, L. J. Lauhon and M. C. Hersam, *Nano Lett.*, 2013, **13**, 4351.
- [7] H. Ji, M. K. Joo, H. Yi, H. Choi, H. Z. Gul, M. K. Ghimire and S. C. Lim, *ACS Appl. Mater. Interfaces*, 2017, **9**, 29185.
- [8] J. Renteria, R. Samnakay, S. L. Rumyantsev, C. Jiang, P. Goli, M. S. Shur and A. A. Balandin, *Appl. Phys. Lett.*, 2014, **104**, 153104.
- [9] F. J. Klüpfel, H. von Wenckstern and M. Grundmann, *Appl. Phys. Lett.*, 2015, **106**, 033502.
- [10] D. Sharma, A. Motayed, P. B. Shah, M. Amani, M. Georgieva, A. Glen Birdwell, M. Dubey, Q. Li and A. V. Davydov, *Appl. Phys. Lett.*, 2015, **107**, 162102.
- [11] F. N. Hooge, *Phys. Lett. A*, 1969, **29**, 139.
- [12] T. C. Fung, G. Baek and J. Kanicki, *J. Appl. Phys.*, 2010, **108**, 074518.

- [13] B. R. Conrad, W. G. Cullen, W. Yan and E. D. Williams, *Appl. Phys. Lett.*, 2017, **91**, 242110.
- [14] P. V. Necliudov, S. L. Romyantsev, M. S. Shur, D. J. Gundlach and T. N. Jackson, *J. Appl. Phys.*, 2020, **88**, 5395.
